# Supplementary material for: Metabolic Signatures in Coronary Artery Disease: Results from the BioHEART-CT Study
Source: MDPI journal article supplement (doi:10.3390/cells10050980), 2021-04-22
Supplement: s1 [file s1]

**Supplementary Table 1: Metabolic pathways**

| Metabolite                                                              | Super-Pathway | Sub-Pathway                                          |
|-------------------------------------------------------------------------|---------------|------------------------------------------------------|
| <b><math>\alpha</math>-keto-<math>\beta</math>-methylvaleric acid 1</b> | Amino Acid    | Leucine, Isoleucine and Valine Metabolism            |
| <b><math>\alpha</math>-keto-<math>\beta</math>-methylvaleric acid 2</b> | Amino Acid    | Leucine, Isoleucine and Valine Metabolism            |
| <b>1-methylhistamine</b>                                                | Amino Acid    | Histidine Metabolism                                 |
| <b>2-Arachidonyl glycerol</b>                                           | Lipid         | Glycerolipid Metabolism                              |
| <b>2'-deoxyadenosine</b>                                                | Nucleotide    | Pyrimidine Metabolism, Cytidine containing           |
| <b>3-IPA</b>                                                            | Amino Acid    | Tryptophan Metabolism                                |
| <b>3HK</b>                                                              | Amino Acid    | Tryptophan Metabolism                                |
| <b>5-Aminolevulinic Acid</b>                                            | Energy        | Heme synthesis                                       |
| <b>Acetylcarnitine</b>                                                  | Lipid         | Fatty Acid Metabolism(Acyl Carnitine)                |
| <b>Adenosine</b>                                                        | Nucleotide    | Purine Metabolism, Adenine containing                |
| <b>Alanine</b>                                                          | Amino Acid    | Alanine and Aspartate Metabolism                     |
| <b>Anandamide</b>                                                       | Lipid         | Endocannabinoid                                      |
| <b>Arachidonic acid</b>                                                 | Lipid         | Fatty acid Metabolism                                |
| <b>Arginine</b>                                                         | Amino Acid    | Urea cycle; Arginine and Proline Metabolism          |
| <b>Asparagine</b>                                                       | Amino Acid    | Alanine and Aspartate Metabolism                     |
| <b>Aspartate</b>                                                        | Amino Acid    | Alanine and Aspartate Metabolism                     |
| <b>Betaine</b>                                                          | Amino Acid    | Glycine, Serine and Threonine Metabolism             |
| <b>Butyrylcarnitine</b>                                                 | Lipid         | Fatty Acid Metabolism                                |
| <b>cAMP</b>                                                             | Nucleotide    | Purine Metabolism, Adenine containing                |
| <b>Carnitine</b>                                                        | Lipid         | Carnitine Metabolism                                 |
| <b>Choline</b>                                                          | Lipid         | Phospholipid Metabolism                              |
| <b>Creatine</b>                                                         | Amino Acid    | Creatine Metabolism                                  |
| <b>Cysteamine</b>                                                       | Amino Acid    | Methionine, Cysteine, SAM and Taurine Metabolism     |
| <b>Cysteine</b>                                                         | Amino Acid    | Methionine, Cysteine, SAM and Taurine Metabolism     |
| <b>Cytosine</b>                                                         | Nucleotide    | Pyrimidine Metabolism, Cytidine containing           |
| <b>DMGV</b>                                                             | amino Acid    | Urea cycle; Arginine and Proline Metabolism          |
| <b>GlucosePos2</b>                                                      | Carbohydrate  | Glycolysis, Gluconeogenesis, and Pyruvate Metabolism |
| <b>Glutamate</b>                                                        | Amino Acid    | Glutamate Metabolism                                 |
| <b>Glutamine</b>                                                        | Amino Acid    | Glutamate Metabolism                                 |
| <b>Histidine</b>                                                        | Amino Acid    | Histidine Metabolism                                 |
| <b>Isoleucine_Leucine</b>                                               | Amino Acid    | Leucine, Isoleucine and Valine Metabolism            |
| <b>Kynurenic acid</b>                                                   | Amino Acid    | Tryptophan Metabolism                                |

|                       |                        |                                                      |
|-----------------------|------------------------|------------------------------------------------------|
| <b>L-Homoserine</b>   | Amino Acid             | Glycine, Serine and Threonine Metabolism             |
| <b>Methionine</b>     | Amino Acid             | Methionine, Cysteine, SAM and Taurine Metabolism     |
| <b>Phenylalanine</b>  | Amino Acid             | Phenylalanine                                        |
| <b>Phosphocholine</b> | Lipid                  | Phosphatidylcholine                                  |
| <b>Proline</b>        | Amino Acid             | Proline                                              |
| <b>Riboflavin</b>     | Cofactors and Vitamins | Riboflavin                                           |
| <b>Serine</b>         | Amino Acid             | Glycine, Serine and Threonine Metabolism             |
| <b>Serotonin</b>      | Amino Acid             | Tryptophan Metabolism                                |
| <b>Spermine</b>       | Amino Acid             | Polyamine Metabolism                                 |
| <b>Taurine</b>        | Amino Acid             | Taurine                                              |
| <b>Thiamine</b>       | Carbohydrate           | Glycolysis, Gluconeogenesis, and Pyruvate Metabolism |
| <b>Threonine</b>      | Amino Acid             | Threonine                                            |
| <b>Thymidine</b>      | Nucleotide             | Pyrimidine Metabolism, Thymine containing            |
| <b>TMAO</b>           | Lipid                  | Phospholipid Metabolism                              |
| <b>trans-HYP</b>      | Amino Acid             | Urea cycle; Arginine and Proline Metabolism          |
| <b>Tyrosine</b>       | Amino Acid             | Tyrosine Metabolism                                  |
| <b>Uridine</b>        | Nucleotide             | Pyrimidine Metabolism, Uracil containing             |
| <b>Valine</b>         | Amino Acid             | Leucine, Isoleucine and Valine Metabolism            |
| <b>Valine-d8</b>      | Amino Acid             | Leucine, Isoleucine and Valine Metabolism            |

**Supplementary Table 2.** Pearson correlations of DMGV with traditional CAD risk factors.

|                       | <b>Pearson<br/>Correlation</b> | <b>P value</b>   |
|-----------------------|--------------------------------|------------------|
| Hypertension          | 0.145                          | <b>&lt;0.001</b> |
| Hypercholesterolaemia | 0.029                          | 0.359            |
| Diabetes mellitus     | 0.172                          | <b>&lt;0.001</b> |
| Smoking               | 0.078                          | <b>0.014</b>     |
| Body mass index       | 0.218                          | <b>&lt;0.001</b> |
| Age                   | 0.135                          | <b>&lt;0.001</b> |
| Gender                | 0.011                          | 0.729            |

**Supplementary Table 3.** DMGV associations with presence of CAD, adjusted for traditional risk factors (one at a time).

|                           | <b>CAD</b> |                 |                 |                |
|---------------------------|------------|-----------------|-----------------|----------------|
|                           | <b>OR</b>  | <b>Lower CI</b> | <b>Upper CI</b> | <b>P value</b> |
| <b>DMGV (unadjusted)</b>  | 1.41       | 1.12            | 1.79            | <b>0.004</b>   |
|                           |            |                 |                 |                |
| <b>DMGV adjusted for:</b> |            |                 |                 |                |
| Hypertension              | 1.30       | 1.02            | 1.66            | <b>0.033</b>   |
| Hypercholesterolaemia     | 1.40       | 1.10            | 1.79            | <b>0.006</b>   |
| Diabetes mellitus         | 1.37       | 1.08            | 1.74            | <b>0.011</b>   |
| Smoking                   | 1.42       | 1.12            | 1.80            | <b>0.004</b>   |
| Body mass index           | 1.02       | 0.99            | 1.05            | 0.258          |
| Age                       | 1.15       | 0.88            | 1.50            | 0.322          |
| Gender                    | 1.41       | 1.11            | 1.80            | <b>0.005</b>   |

**Supplementary Table 4.** Univariate Binary Logistic Regression Associations with Presence of CAD.

| Metabolite                                    | Odds Ratio | lower_CI | upper_CI | P value | FDR Adjusted P-value |
|-----------------------------------------------|------------|----------|----------|---------|----------------------|
| $\alpha$ -keto- $\beta$ -methylvaleric acid 1 | 0.82       | 0.53     | 1.26     | 0.357   | 0.612                |
| $\alpha$ -keto- $\beta$ -methylvaleric acid 2 | 1.23       | 0.91     | 1.67     | 0.184   | 0.424                |
| Acetylcarnitine                               | 0.86       | 0.70     | 1.06     | 0.166   | 0.399                |
| Adenosine                                     | 1.47       | 1.04     | 2.08     | 0.031   | 0.207                |
| Alanine                                       | 0.97       | 0.78     | 1.22     | 0.808   | 0.948                |
| Anandamide                                    | 0.88       | 0.62     | 1.25     | 0.464   | 0.723                |
| Arachidonic.acid                              | 0.72       | 0.48     | 1.07     | 0.104   | 0.324                |
| Arginine                                      | 1.00       | 0.75     | 1.32     | 0.972   | 0.972                |
| Asparagine                                    | 1.60       | 1.13     | 2.27     | 0.008   | 0.089                |
| Aspartate                                     | 1.03       | 0.76     | 1.39     | 0.846   | 0.948                |
| Betaine                                       | 0.95       | 0.79     | 1.15     | 0.621   | 0.850                |
| Butyrylcarnitine                              | 1.02       | 0.79     | 1.32     | 0.868   | 0.948                |
| cAMP                                          | 1.39       | 1.12     | 1.74     | 0.003   | 0.075                |
| Carnitine                                     | 1.14       | 0.78     | 1.65     | 0.498   | 0.755                |
| Choline                                       | 1.45       | 0.99     | 2.13     | 0.057   | 0.233                |
| Colchicine                                    | 0.82       | 0.64     | 1.06     | 0.134   | 0.375                |
| Creatine                                      | 0.97       | 0.68     | 1.38     | 0.844   | 0.948                |
| Cysteamine                                    | 0.76       | 0.54     | 1.08     | 0.122   | 0.359                |
| Cysteine                                      | 1.04       | 0.70     | 1.54     | 0.844   | 0.948                |
| Cytosine                                      | 1.08       | 0.79     | 1.46     | 0.642   | 0.850                |
| DMGV                                          | 1.41       | 1.12     | 1.79     | 0.004   | 0.075                |
| GlucosePos2                                   | 0.99       | 0.68     | 1.44     | 0.946   | 0.972                |
| Glutamate                                     | 1.15       | 0.84     | 1.57     | 0.398   | 0.645                |
| Glutamine                                     | 0.94       | 0.64     | 1.37     | 0.734   | 0.948                |
| Histidine                                     | 0.79       | 0.50     | 1.24     | 0.299   | 0.589                |
| Isoleucine_Leucine                            | 0.96       | 0.70     | 1.31     | 0.796   | 0.948                |
| Kynurenic acid                                | 1.22       | 1.00     | 1.48     | 0.048   | 0.233                |
| L-Homoserine                                  | 1.07       | 0.81     | 1.40     | 0.631   | 0.850                |
| Methionine                                    | 1.03       | 0.75     | 1.41     | 0.877   | 0.948                |
| Phenylalanine                                 | 0.99       | 0.65     | 1.48     | 0.943   | 0.972                |
| Phosphocholine                                | 1.16       | 0.82     | 1.64     | 0.401   | 0.645                |
| Proline                                       | 1.58       | 1.13     | 2.21     | 0.008   | 0.089                |
| Riboflavin                                    | 1.15       | 0.97     | 1.35     | 0.101   | 0.324                |
| Serine                                        | 0.91       | 0.74     | 1.12     | 0.358   | 0.612                |
| Serotonin                                     | 0.89       | 0.59     | 1.33     | 0.557   | 0.804                |

|                               |      |      |      |       |       |
|-------------------------------|------|------|------|-------|-------|
| <b>Spermine</b>               | 1.43 | 1.08 | 1.90 | 0.013 | 0.116 |
| <b>Taurine</b>                | 0.93 | 0.71 | 1.20 | 0.561 | 0.804 |
| <b>Thiamine</b>               | 1.36 | 1.01 | 1.84 | 0.042 | 0.223 |
| <b>Threonine</b>              | 0.82 | 0.56 | 1.20 | 0.311 | 0.589 |
| <b>Thymidine</b>              | 0.58 | 0.35 | 0.97 | 0.037 | 0.216 |
| <b>TMAO</b>                   | 0.85 | 0.62 | 1.16 | 0.305 | 0.589 |
| <b>trans-HYP</b>              | 0.84 | 0.69 | 1.02 | 0.084 | 0.318 |
| <b>Tyrosine</b>               | 0.71 | 0.51 | 1.01 | 0.054 | 0.233 |
| <b>Uridine</b>                | 0.64 | 0.47 | 0.86 | 0.004 | 0.075 |
| <b>Valine</b>                 | 1.20 | 0.86 | 1.69 | 0.281 | 0.589 |
| <b>Valine-d8</b>              | 0.99 | 0.78 | 1.28 | 0.963 | 0.972 |
| <b>1-methylhistamine</b>      | 1.25 | 0.83 | 1.86 | 0.285 | 0.589 |
| <b>2'-deoxyadenosine</b>      | 0.90 | 0.73 | 1.11 | 0.333 | 0.608 |
| <b>2-Arachidonyl glycerol</b> | 0.65 | 0.45 | 0.95 | 0.026 | 0.200 |
| <b>3-deaazadenosine</b>       | 0.76 | 0.51 | 1.12 | 0.165 | 0.399 |
| <b>3-IPA</b>                  | 0.90 | 0.79 | 1.02 | 0.104 | 0.324 |
| <b>3HK</b>                    | 1.14 | 0.95 | 1.35 | 0.153 | 0.399 |
| <b>5-Aminolevulinic Acid</b>  | 0.98 | 0.83 | 1.16 | 0.792 | 0.948 |

**Supplementary Table 5.** Univariate Binary Logistic Regression Associations with Presence of Calcified Plaque.

| Metabolite                                    | Odds Ratio | lower_CI | upper_CI | P value | FDR Adjusted P-value |
|-----------------------------------------------|------------|----------|----------|---------|----------------------|
| $\alpha$ -keto- $\beta$ -methylvaleric acid 1 | 0.89       | 0.59     | 1.34     | 0.568   | 0.739                |
| $\alpha$ -keto- $\beta$ -methylvaleric acid 2 | 1.18       | 0.88     | 1.58     | 0.268   | 0.617                |
| Acetylcarnitine                               | 0.89       | 0.73     | 1.09     | 0.258   | 0.617                |
| Adenosine                                     | 1.47       | 1.05     | 2.05     | 0.024   | 0.130                |
| Alanine                                       | 0.99       | 0.79     | 1.22     | 0.894   | 0.894                |
| Anandamide                                    | 0.85       | 0.61     | 1.19     | 0.345   | 0.651                |
| Arachidonic acid                              | 0.69       | 0.47     | 1.02     | 0.063   | 0.257                |
| Arginine                                      | 1.11       | 0.85     | 1.46     | 0.438   | 0.683                |
| Asparagine                                    | 1.62       | 1.15     | 2.27     | 0.006   | 0.044                |
| Aspartate                                     | 1.09       | 0.81     | 1.45     | 0.576   | 0.739                |
| Betaine                                       | 0.96       | 0.80     | 1.15     | 0.653   | 0.786                |
| Butyrylcarnitine                              | 1.11       | 0.87     | 1.42     | 0.414   | 0.683                |
| cAMP                                          | 1.36       | 1.11     | 1.67     | 0.003   | 0.031                |
| Carnitine                                     | 1.16       | 0.81     | 1.67     | 0.421   | 0.683                |
| Choline                                       | 1.32       | 0.91     | 1.92     | 0.140   | 0.469                |
| Colchicine                                    | 0.83       | 0.64     | 1.07     | 0.156   | 0.487                |
| Creatine                                      | 0.95       | 0.67     | 1.34     | 0.765   | 0.834                |
| Cysteamine                                    | 0.71       | 0.51     | 1.00     | 0.050   | 0.219                |
| Cysteine                                      | 1.22       | 0.83     | 1.78     | 0.307   | 0.625                |
| Cytosine                                      | 1.14       | 0.84     | 1.53     | 0.402   | 0.683                |
| DMGV                                          | 1.59       | 1.26     | 2.01     | 0.0001  | 0.006                |
| GlucosePos2                                   | 0.87       | 0.61     | 1.26     | 0.464   | 0.703                |
| Glutamate                                     | 1.21       | 0.89     | 1.65     | 0.214   | 0.539                |
| Glutamine                                     | 0.90       | 0.62     | 1.30     | 0.561   | 0.739                |
| Histidine                                     | 0.91       | 0.59     | 1.42     | 0.690   | 0.796                |
| Isoleucine_Leucine                            | 0.92       | 0.68     | 1.25     | 0.604   | 0.745                |
| Kynurenic acid                                | 1.32       | 1.09     | 1.60     | 0.004   | 0.037                |
| L-Homoserine                                  | 1.15       | 0.89     | 1.50     | 0.291   | 0.625                |
| Methionine                                    | 1.10       | 0.81     | 1.49     | 0.554   | 0.739                |
| Phenylalanine                                 | 1.12       | 0.75     | 1.67     | 0.570   | 0.739                |
| Phosphocholine                                | 1.03       | 0.74     | 1.43     | 0.879   | 0.894                |
| Proline                                       | 1.69       | 1.21     | 2.36     | 0.002   | 0.030                |
| Riboflavin                                    | 1.14       | 0.98     | 1.33     | 0.100   | 0.380                |
| Serine                                        | 0.97       | 0.80     | 1.19     | 0.771   | 0.834                |

|                               |      |      |      |       |       |
|-------------------------------|------|------|------|-------|-------|
| <b>Serotonin</b>              | 0.81 | 0.55 | 1.20 | 0.300 | 0.625 |
| <b>Spermine</b>               | 1.54 | 1.17 | 2.02 | 0.002 | 0.030 |
| <b>Taurine</b>                | 0.93 | 0.72 | 1.20 | 0.585 | 0.739 |
| <b>Thiamine</b>               | 1.36 | 1.02 | 1.81 | 0.035 | 0.170 |
| <b>Threonine</b>              | 0.96 | 0.67 | 1.38 | 0.823 | 0.872 |
| <b>Thymidine</b>              | 0.53 | 0.32 | 0.87 | 0.012 | 0.072 |
| <b>TMAO</b>                   | 0.98 | 0.72 | 1.32 | 0.885 | 0.894 |
| <b>trans-HYP</b>              | 0.87 | 0.72 | 1.05 | 0.142 | 0.469 |
| <b>Tyrosine</b>               | 0.81 | 0.58 | 1.11 | 0.191 | 0.539 |
| <b>Uridine</b>                | 0.63 | 0.47 | 0.84 | 0.002 | 0.030 |
| <b>Valine</b>                 | 1.17 | 0.84 | 1.61 | 0.356 | 0.651 |
| <b>Valine.d8</b>              | 0.96 | 0.75 | 1.22 | 0.711 | 0.802 |
| <b>1-methylhistamine</b>      | 1.12 | 0.76 | 1.66 | 0.556 | 0.739 |
| <b>2'-deoxyadenosine</b>      | 0.92 | 0.75 | 1.13 | 0.431 | 0.683 |
| <b>2-Arachidonyl glycerol</b> | 0.62 | 0.43 | 0.89 | 0.010 | 0.066 |
| <b>3-deaazadenosine</b>       | 0.82 | 0.56 | 1.21 | 0.318 | 0.625 |
| <b>3-IPA</b>                  | 0.92 | 0.82 | 1.05 | 0.207 | 0.539 |
| <b>3HK</b>                    | 1.12 | 0.94 | 1.32 | 0.198 | 0.539 |
| <b>5-Aminolevulinic Acid</b>  | 0.97 | 0.82 | 1.14 | 0.691 | 0.796 |

**Supplementary Table 6.** Univariate Binary Logistic Regression Associations with Presence of Non-calcified Plaque.

| Metabolite                                    | Odds Ratio | lower_CI | upper_CI | P value | FDR Adjusted P-value |
|-----------------------------------------------|------------|----------|----------|---------|----------------------|
| $\alpha$ -keto- $\beta$ -methylvaleric acid 1 | 1.02       | 0.68     | 1.52     | 0.941   | 0.985                |
| $\alpha$ -keto- $\beta$ -methylvaleric acid 2 | 1.01       | 0.76     | 1.35     | 0.932   | 0.985                |
| Acetylcarnitine                               | 0.94       | 0.77     | 1.13     | 0.496   | 0.822                |
| Adenosine                                     | 1.18       | 0.86     | 1.63     | 0.294   | 0.653                |
| Alanine                                       | 1.01       | 0.82     | 1.25     | 0.923   | 0.985                |
| Anandamide                                    | 0.85       | 0.61     | 1.19     | 0.340   | 0.721                |
| Arachidonic acid                              | 0.67       | 0.45     | 0.98     | 0.040   | 0.193                |
| Arginine                                      | 0.89       | 0.68     | 1.16     | 0.394   | 0.746                |
| Asparagine                                    | 1.36       | 0.98     | 1.90     | 0.067   | 0.235                |
| Aspartate                                     | 0.88       | 0.66     | 1.17     | 0.384   | 0.746                |
| Betaine                                       | 0.99       | 0.83     | 1.19     | 0.948   | 0.985                |
| Butyrylcarnitine                              | 1.03       | 0.81     | 1.31     | 0.824   | 0.930                |
| cAMP                                          | 1.28       | 1.06     | 1.54     | 0.010   | 0.129                |
| Carnitine                                     | 1.29       | 0.90     | 1.86     | 0.169   | 0.473                |
| Choline                                       | 1.63       | 1.12     | 2.36     | 0.011   | 0.129                |
| Colchicine                                    | 0.86       | 0.66     | 1.11     | 0.235   | 0.567                |
| Creatine                                      | 0.96       | 0.68     | 1.34     | 0.809   | 0.930                |
| Cysteamine                                    | 0.75       | 0.54     | 1.05     | 0.092   | 0.271                |
| Cysteine                                      | 0.82       | 0.57     | 1.19     | 0.295   | 0.653                |
| Cytosine                                      | 0.91       | 0.68     | 1.22     | 0.536   | 0.835                |
| DMGV                                          | 1.40       | 1.11     | 1.75     | 0.004   | 0.129                |
| GlucosePos2                                   | 1.10       | 0.77     | 1.58     | 0.590   | 0.845                |
| Glutamate                                     | 1.48       | 1.09     | 2.01     | 0.011   | 0.129                |
| Glutamine                                     | 0.99       | 0.69     | 1.43     | 0.973   | 0.991                |
| Histidine                                     | 0.62       | 0.40     | 0.96     | 0.031   | 0.166                |
| Isoleucine_Leucine                            | 1.08       | 0.80     | 1.45     | 0.620   | 0.865                |
| Kynurenic acid                                | 1.18       | 0.98     | 1.41     | 0.088   | 0.271                |
| L-Homoserine                                  | 1.00       | 0.77     | 1.29     | 0.999   | 0.999                |
| Methionine                                    | 1.21       | 0.89     | 1.64     | 0.220   | 0.556                |
| Phenylalanine                                 | 0.88       | 0.60     | 1.30     | 0.526   | 0.835                |
| Phosphocholine                                | 1.15       | 0.83     | 1.59     | 0.415   | 0.754                |
| Proline                                       | 1.38       | 1.00     | 1.90     | 0.049   | 0.198                |
| Riboflavin                                    | 1.15       | 0.98     | 1.34     | 0.083   | 0.271                |
| Serine                                        | 1.03       | 0.84     | 1.25     | 0.786   | 0.930                |
| Serotonin                                     | 0.78       | 0.53     | 1.15     | 0.215   | 0.556                |



|                               |      |      |      |       |       |
|-------------------------------|------|------|------|-------|-------|
| <b>Spermine</b>               | 1.36 | 1.04 | 1.79 | 0.025 | 0.162 |
| <b>Taurine</b>                | 0.90 | 0.70 | 1.16 | 0.427 | 0.754 |
| <b>Thiamine</b>               | 1.31 | 1.00 | 1.73 | 0.053 | 0.201 |
| <b>Threonine</b>              | 1.10 | 0.77 | 1.58 | 0.588 | 0.845 |
| <b>Thymidine</b>              | 0.57 | 0.35 | 0.92 | 0.022 | 0.162 |
| <b>TMAO</b>                   | 0.72 | 0.53 | 0.97 | 0.029 | 0.166 |
| <b>trans-HYP</b>              | 0.94 | 0.78 | 1.13 | 0.489 | 0.822 |
| <b>Tyrosine</b>               | 0.93 | 0.68 | 1.27 | 0.641 | 0.872 |
| <b>Uridine</b>                | 0.69 | 0.52 | 0.92 | 0.012 | 0.129 |
| <b>Valine</b>                 | 1.06 | 0.77 | 1.45 | 0.744 | 0.930 |
| <b>Valine.d8</b>              | 1.05 | 0.83 | 1.34 | 0.668 | 0.885 |
| <b>1-methylhistamine</b>      | 1.08 | 0.74 | 1.58 | 0.697 | 0.900 |
| <b>2'-deoxyadenosine</b>      | 1.03 | 0.84 | 1.25 | 0.779 | 0.930 |
| <b>2-Arachidonyl glycerol</b> | 0.90 | 0.63 | 1.28 | 0.554 | 0.839 |
| <b>3-deaazadenosine</b>       | 1.05 | 0.72 | 1.52 | 0.819 | 0.930 |
| <b>3-IPA</b>                  | 0.86 | 0.76 | 0.97 | 0.017 | 0.155 |
| <b>3HK</b>                    | 1.19 | 1.00 | 1.40 | 0.047 | 0.198 |
| <b>5-Aminolevulinic Acid</b>  | 1.08 | 0.92 | 1.26 | 0.365 | 0.743 |

**Supplementary Table 7.** Univariate Binary Logistic Regression Associations with Presence of Obstructive CAD.

| Metabolite                                    | Odds Ratio | lower_CI | upper_CI | P value | FDR Adjusted P-value |
|-----------------------------------------------|------------|----------|----------|---------|----------------------|
| $\alpha$ -keto- $\beta$ -methylvaleric acid 1 | 0.9        | 0.45     | 1.78     | 0.763   | 0.833                |
| $\alpha$ -keto- $\beta$ -methylvaleric acid 2 | 1.11       | 0.72     | 1.71     | 0.644   | 0.827                |
| Acetylcarnitine                               | 0.86       | 0.65     | 1.14     | 0.295   | 0.54                 |
| Adenosine                                     | 1.74       | 1.09     | 2.78     | 0.020   | 0.128                |
| Alanine                                       | 1.02       | 0.74     | 1.42     | 0.903   | 0.921                |
| Anandamide                                    | 0.81       | 0.5      | 1.31     | 0.39    | 0.607                |
| Arachidonic acid                              | 0.51       | 0.27     | 0.95     | 0.034   | 0.139                |
| Arginine                                      | 1.01       | 0.68     | 1.5      | 0.966   | 0.966                |
| Asparagine                                    | 1.89       | 1.12     | 3.17     | 0.016   | 0.128                |
| Aspartate                                     | 1.18       | 0.78     | 1.78     | 0.429   | 0.626                |
| Betaine                                       | 1.05       | 0.8      | 1.38     | 0.711   | 0.833                |
| Butyrylcarnitine                              | 1.18       | 0.81     | 1.72     | 0.385   | 0.607                |
| cAMP                                          | 1.39       | 1.06     | 1.82     | 0.017   | 0.128                |
| Carnitine                                     | 1.36       | 0.75     | 2.47     | 0.31    | 0.54                 |
| Choline                                       | 1.24       | 0.72     | 2.16     | 0.439   | 0.626                |
| Colchicine                                    | 0.70       | 0.43     | 1.13     | 0.141   | 0.394                |
| Creatine                                      | 1.12       | 0.66     | 1.9      | 0.671   | 0.827                |
| Cysteamine                                    | 0.54       | 0.31     | 0.92     | 0.024   | 0.128                |
| Cysteine                                      | 1.06       | 0.62     | 1.81     | 0.843   | 0.894                |
| Cytosine                                      | 1.29       | 0.81     | 2.06     | 0.284   | 0.54                 |
| DMGV                                          | 2.33       | 1.59     | 3.43     | <0.001  | <0.001               |
| GlucosePos2                                   | 1.12       | 0.67     | 1.87     | 0.669   | 0.827                |
| Glutamate                                     | 1.25       | 0.78     | 2.01     | 0.361   | 0.597                |
| Glutamine                                     | 1.1        | 0.61     | 1.98     | 0.75    | 0.833                |
| Histidine                                     | 0.63       | 0.33     | 1.19     | 0.153   | 0.405                |
| Isoleucine_Leucine                            | 0.93       | 0.57     | 1.5      | 0.752   | 0.833                |
| Kynurenic acid                                | 1.49       | 1.1      | 2.02     | 0.01    | 0.128                |
| L-Homoserine                                  | 1.09       | 0.75     | 1.6      | 0.653   | 0.827                |
| Methionine                                    | 1.28       | 0.81     | 2.02     | 0.296   | 0.54                 |
| Phenylalanine                                 | 1.84       | 1.01     | 3.33     | 0.046   | 0.173                |
| Phosphocholine                                | 0.09       | 0.66     | 1.81     | 0.731   | 0.833                |
| Proline                                       | 1.99       | 1.2      | 3.28     | 0.007   | 0.128                |
| Riboflavin                                    | 1.34       | 1.06     | 1.67     | 0.012   | 0.128                |
| Serine                                        | 0.98       | 0.73     | 1.32     | 0.889   | 0.921                |

|                               |      |      |      |        |       |
|-------------------------------|------|------|------|--------|-------|
| <b>Serotonin</b>              | 0.66 | 0.38 | 1.13 | 0.129  | 0.38  |
| <b>Spermine</b>               | 1.56 | 1.04 | 2.35 | 0.0321 | 0.139 |
| <b>Taurine</b>                | 0.79 | 0.54 | 1.14 | 0.202  | 0.511 |
| <b>Thiamine</b>               | 1.5  | 1.04 | 2.17 | 0.0303 | 0.139 |
| <b>Threonine</b>              | 0.76 | 0.46 | 1.27 | 0.296  | 0.54  |
| <b>Thymidine</b>              | 0.51 | 0.24 | 1.08 | 0.0807 | 0.267 |
| <b>TMAO</b>                   | 0.79 | 0.52 | 1.22 | 0.292  | 0.54  |
| <b>trans-HYP</b>              | 0.86 | 0.67 | 1.12 | 0.259  | 0.54  |
| <b>Tyrosine</b>               | 0.69 | 0.43 | 1.11 | 0.128  | 0.38  |
| <b>Uridine</b>                | 0.6  | 0.4  | 0.9  | 0.0125 | 0.128 |
| <b>Valine</b>                 | 1.33 | 0.8  | 2.13 | 0.23   | 0.53  |
| <b>Valine-d8</b>              | 1.16 | 0.8  | 1.68 | 0.449  | 0.626 |
| <b>1-methylhistamine</b>      | 0.78 | 0.43 | 1.4  | 0.408  | 0.618 |
| <b>2'-deoxyadenosine</b>      | 0.86 | 0.65 | 1.15 | 0.316  | 0.54  |
| <b>2-Arachidonyl glycerol</b> | 0.56 | 0.33 | 0.93 | 0.024  | 0.128 |
| <b>3-deaazadenosine</b>       | 0.84 | 0.48 | 1.47 | 0.534  | 0.726 |
| <b>3-IPA</b>                  | 0.85 | 0.71 | 1.02 | 0.077  | 0.267 |
| <b>3HK</b>                    | 1.16 | 0.91 | 1.47 | 0.223  | 0.53  |
| <b>5-Aminolevulinic Acid</b>  | 0.97 | 0.77 | 1.22 | 0.77   | 0.833 |

**Supplementary Table 8.** Univariate Linear Regression Associations with Gensini Score.

| Metabolite                                    | Beta  | lower_<br>CI.2.5<br>% | upper_<br>CI.97.5<br>% | P value | FDR<br>Adjusted<br>P-value |
|-----------------------------------------------|-------|-----------------------|------------------------|---------|----------------------------|
| $\alpha$ -keto- $\beta$ -methylvaleric acid 1 | -0.06 | -0.35                 | 0.23                   | 0.690   | 0.871                      |
| $\alpha$ -keto- $\beta$ -methylvaleric acid 2 | -0.20 | -0.42                 | 0.01                   | 0.063   | 0.418                      |
| Acetylcarnitine                               | 0.02  | -0.12                 | 0.17                   | 0.781   | 0.905                      |
| Adenosine                                     | 0.10  | -0.13                 | 0.33                   | 0.388   | 0.655                      |
| Alanine                                       | -0.05 | -0.21                 | 0.11                   | 0.512   | 0.776                      |
| Anandamide                                    | -0.06 | -0.32                 | 0.19                   | 0.628   | 0.833                      |
| Arachidonic acid                              | -0.14 | -0.43                 | 0.14                   | 0.321   | 0.655                      |
| Arginine                                      | 0.02  | -0.19                 | 0.22                   | 0.865   | 0.954                      |
| Asparagine                                    | 0.01  | -0.24                 | 0.25                   | 0.965   | 0.985                      |
| Aspartate                                     | 0.00  | -0.22                 | 0.22                   | 0.993   | 0.993                      |
| Betaine                                       | 0.04  | -0.10                 | 0.18                   | 0.561   | 0.827                      |
| Butyrylcarnitine                              | 0.09  | -0.10                 | 0.27                   | 0.365   | 0.655                      |
| cAMP                                          | 0.06  | -0.07                 | 0.18                   | 0.357   | 0.655                      |
| Carnitine                                     | 0.29  | 0.03                  | 0.54                   | 0.029   | 0.219                      |
| Choline                                       | -0.04 | -0.32                 | 0.24                   | 0.785   | 0.905                      |
| Colchicine                                    | 0.04  | -0.17                 | 0.25                   | 0.720   | 0.887                      |
| Creatine                                      | 0.02  | -0.23                 | 0.26                   | 0.892   | 0.954                      |
| Cysteamine                                    | -0.18 | -0.41                 | 0.06                   | 0.145   | 0.548                      |
| Cysteine                                      | -0.03 | -0.31                 | 0.25                   | 0.833   | 0.939                      |
| Cytosine                                      | 0.11  | -0.10                 | 0.33                   | 0.309   | 0.655                      |
| DMGV                                          | 0.30  | 0.14                  | 0.45                   | 0.0002  | 0.014                      |
| GlucosePos2                                   | 0.14  | -0.15                 | 0.44                   | 0.339   | 0.655                      |
| Glutamate                                     | 0.14  | -0.09                 | 0.36                   | 0.234   | 0.655                      |
| Glutamine                                     | 0.13  | -0.14                 | 0.39                   | 0.349   | 0.655                      |
| Histidine                                     | -0.19 | -0.52                 | 0.13                   | 0.247   | 0.655                      |
| Isoleucine_Leucine                            | -0.06 | -0.28                 | 0.15                   | 0.579   | 0.830                      |
| Kynurenic acid                                | 0.17  | 0.04                  | 0.30                   | 0.012   | 0.205                      |
| L-Homoserine                                  | -0.01 | -0.21                 | 0.18                   | 0.900   | 0.954                      |
| Methionine                                    | 0.27  | 0.04                  | 0.50                   | 0.020   | 0.218                      |
| Phenylalanine                                 | 0.33  | 0.04                  | 0.62                   | 0.025   | 0.218                      |
| Phosphocholine                                | -0.12 | -0.36                 | 0.12                   | 0.331   | 0.655                      |
| Proline                                       | 0.18  | -0.06                 | 0.41                   | 0.136   | 0.548                      |
| Riboflavin                                    | 0.15  | 0.04                  | 0.26                   | 0.009   | 0.205                      |
| Serine                                        | 0.04  | -0.11                 | 0.19                   | 0.616   | 0.833                      |
| Serotonin                                     | -0.16 | -0.45                 | 0.13                   | 0.278   | 0.655                      |
| Spermine                                      | 0.08  | -0.12                 | 0.28                   | 0.427   | 0.685                      |
| Taurine                                       | 0.06  | -0.12                 | 0.25                   | 0.497   | 0.775                      |

|                               |       |       |       |       |       |
|-------------------------------|-------|-------|-------|-------|-------|
| <b>Thiamine</b>               | 0.17  | -0.03 | 0.37  | 0.096 | 0.509 |
| <b>Threonine</b>              | 0.13  | -0.15 | 0.41  | 0.371 | 0.655 |
| <b>Thymidine</b>              | -0.39 | -0.73 | -0.05 | 0.023 | 0.218 |
| <b>TMAO</b>                   | -0.16 | -0.39 | 0.07  | 0.185 | 0.653 |
| <b>trans-HYP</b>              | 0.02  | -0.12 | 0.16  | 0.741 | 0.893 |
| <b>Tyrosine</b>               | 0.11  | -0.13 | 0.34  | 0.379 | 0.655 |
| <b>Uridine</b>                | -0.17 | -0.40 | 0.05  | 0.123 | 0.548 |
| <b>Valine</b>                 | -0.11 | -0.35 | 0.13  | 0.364 | 0.655 |
| <b>Valine-d8</b>              | 0.05  | -0.13 | 0.22  | 0.607 | 0.833 |
| <b>1-methylhistamine</b>      | -0.15 | -0.44 | 0.13  | 0.293 | 0.655 |
| <b>2'-deoxyadenosine</b>      | 0.06  | -0.08 | 0.21  | 0.395 | 0.655 |
| <b>2-Arachidonyl.glycerol</b> | -0.01 | -0.28 | 0.27  | 0.966 | 0.985 |
| <b>3-deaazadenosine</b>       | 0.26  | -0.02 | 0.54  | 0.073 | 0.429 |
| <b>3-IPA</b>                  | -0.07 | -0.17 | 0.02  | 0.137 | 0.548 |
| <b>3HK</b>                    | 0.07  | -0.06 | 0.20  | 0.263 | 0.655 |
| <b>5-Aminolevulinic Acid</b>  | 0.03  | -0.09 | 0.14  | 0.675 | 0.871 |

**Supplementary Table 9.** Univariate Linear Regression Associations with CACS.

| Metabolite                                    | Beta  | lower_CI<br>.25 % | upper_CI<br>.97.5 % | P<br>value | FDR<br>Adjusted<br>P-value |
|-----------------------------------------------|-------|-------------------|---------------------|------------|----------------------------|
| $\alpha$ -keto- $\beta$ -methylvaleric acid 1 | -0.42 | -1.10             | 0.26                | 0.223      | 0.657                      |
| $\alpha$ -keto- $\beta$ -methylvaleric acid 2 | -0.44 | -0.93             | 0.05                | 0.079      | 0.464                      |
| Acetylcarnitine                               | 0.03  | -0.31             | 0.37                | 0.862      | 0.971                      |
| Adenosine                                     | 0.03  | -0.50             | 0.56                | 0.912      | 0.971                      |
| Alanine                                       | -0.16 | -0.52             | 0.20                | 0.390      | 0.784                      |
| Anandamide                                    | 0.14  | -0.46             | 0.74                | 0.644      | 0.892                      |
| Arachidonic acid                              | -0.15 | -0.79             | 0.50                | 0.657      | 0.892                      |
| Arginine                                      | 0.05  | -0.44             | 0.53                | 0.852      | 0.971                      |
| Asparagine                                    | -0.16 | -0.73             | 0.41                | 0.573      | 0.882                      |
| Aspartate                                     | 0.09  | -0.42             | 0.61                | 0.721      | 0.932                      |
| Betaine                                       | 0.14  | -0.18             | 0.46                | 0.387      | 0.784                      |
| Butyrylcarnitine                              | 0.32  | -0.12             | 0.76                | 0.155      | 0.600                      |
| cAMP                                          | 0.17  | -0.12             | 0.46                | 0.240      | 0.668                      |
| Carnitine                                     | 0.62  | 0.02              | 1.22                | 0.044      | 0.334                      |
| Choline                                       | -0.07 | -0.73             | 0.59                | 0.830      | 0.971                      |
| Colchicine                                    | -0.04 | -0.50             | 0.43                | 0.879      | 0.971                      |
| Creatine                                      | 0.31  | -0.25             | 0.88                | 0.273      | 0.677                      |
| Cysteamine                                    | -0.41 | -0.98             | 0.15                | 0.154      | 0.600                      |
| Cysteine                                      | -0.45 | -1.10             | 0.20                | 0.171      | 0.600                      |
| Cytosine                                      | -0.01 | -0.51             | 0.49                | 0.960      | 0.971                      |
| DMGV                                          | 0.49  | 0.11              | 0.87                | 0.011      | 0.292                      |
| GlucosePos2                                   | 0.40  | -0.29             | 1.08                | 0.258      | 0.677                      |
| Glutamate                                     | 0.05  | -0.48             | 0.58                | 0.863      | 0.971                      |
| Glutamine                                     | 0.41  | -0.18             | 1.01                | 0.174      | 0.600                      |
| Histidine                                     | -0.51 | -1.27             | 0.24                | 0.181      | 0.600                      |
| Isoleucine_Leucine                            | -0.14 | -0.63             | 0.35                | 0.582      | 0.882                      |
| Kynurenic acid                                | 0.31  | 0.00              | 0.62                | 0.050      | 0.334                      |
| L-Homoserine                                  | -0.16 | -0.61             | 0.28                | 0.479      | 0.859                      |
| Methionine                                    | 0.54  | 0.01              | 1.07                | 0.045      | 0.334                      |
| Phenylalanine                                 | 0.88  | 0.23              | 1.53                | 0.008      | 0.292                      |
| Phosphocholine                                | -0.30 | -0.87             | 0.27                | 0.296      | 0.681                      |
| Proline                                       | 0.56  | 0.01              | 1.11                | 0.045      | 0.334                      |
| Riboflavin                                    | 0.29  | 0.04              | 0.55                | 0.022      | 0.334                      |
| Serine                                        | -0.19 | -0.55             | 0.16                | 0.281      | 0.677                      |
| Serotonin                                     | -0.21 | -0.87             | 0.45                | 0.541      | 0.882                      |
| Spermine                                      | -0.11 | -0.58             | 0.36                | 0.643      | 0.892                      |
| Taurine                                       | 0.28  | -0.15             | 0.70                | 0.197      | 0.616                      |

|                               |       |       |      |       |       |
|-------------------------------|-------|-------|------|-------|-------|
| <b>Thiamine</b>               | 0.52  | 0.06  | 0.98 | 0.026 | 0.334 |
| <b>Threonine</b>              | -0.21 | -0.88 | 0.45 | 0.529 | 0.882 |
| <b>Thymidine</b>              | -0.32 | -1.11 | 0.47 | 0.430 | 0.815 |
| <b>TMAO</b>                   | -0.46 | -0.99 | 0.08 | 0.093 | 0.464 |
| <b>trans-HYP</b>              | 0.04  | -0.28 | 0.36 | 0.805 | 0.971 |
| <b>Tyrosine</b>               | 0.24  | -0.30 | 0.78 | 0.382 | 0.784 |
| <b>Uridine</b>                | -0.02 | -0.53 | 0.49 | 0.933 | 0.971 |
| <b>Valine</b>                 | -0.14 | -0.70 | 0.42 | 0.621 | 0.892 |
| <b>Valine-d8</b>              | 0.14  | -0.26 | 0.54 | 0.486 | 0.859 |
| <b>1-methylhistamine</b>      | -0.14 | -0.81 | 0.54 | 0.694 | 0.919 |
| <b>2'-deoxyadenosine</b>      | 0.10  | -0.25 | 0.44 | 0.576 | 0.882 |
| <b>2-Arachidonyl glycerol</b> | -0.03 | -0.66 | 0.61 | 0.938 | 0.971 |
| <b>3-deaazadenosine</b>       | 0.55  | -0.10 | 1.20 | 0.096 | 0.464 |
| <b>3-IPA</b>                  | 0.00  | -0.22 | 0.23 | 0.971 | 0.971 |
| <b>3HK</b>                    | 0.13  | -0.17 | 0.42 | 0.400 | 0.784 |
| <b>5-Aminolevulinic Acid</b>  | -0.02 | -0.30 | 0.26 | 0.897 | 0.971 |

**Supplementary Table 10.** Univariate Linear Regression Associations with Soft Plaque Score.

| Metabolite                                    | Beta      | lower_CI.<br>2.5 % | upper_CI<br>.97.5 % | P<br>value | FDR<br>Adjusted<br>P-value |
|-----------------------------------------------|-----------|--------------------|---------------------|------------|----------------------------|
| $\alpha$ -keto- $\beta$ -methylvaleric acid 1 | -<br>0.02 | -0.30              | 0.27                | 0.900      | 0.946                      |
| $\alpha$ -keto- $\beta$ -methylvaleric acid 2 | -<br>0.01 | -0.24              | 0.21                | 0.901      | 0.946                      |
| Acetylcarnitine                               | -<br>0.02 | -0.18              | 0.13                | 0.766      | 0.946                      |
| Adenosine                                     | 0.12      | -0.12              | 0.35                | 0.327      | 0.946                      |
| Alanine                                       | -<br>0.01 | -0.18              | 0.15                | 0.891      | 0.946                      |
| Anandamide                                    | -<br>0.08 | -0.35              | 0.19                | 0.552      | 0.946                      |
| Arachidonic acid                              | -<br>0.03 | -0.33              | 0.27                | 0.828      | 0.946                      |
| Arginine                                      | -<br>0.03 | -0.24              | 0.19                | 0.818      | 0.946                      |
| Asparagine                                    | -<br>0.09 | -0.34              | 0.16                | 0.490      | 0.946                      |
| Aspartate                                     | -<br>0.05 | -0.28              | 0.18                | 0.684      | 0.946                      |
| Betaine                                       | 0.07      | -0.07              | 0.21                | 0.329      | 0.946                      |
| Butyrylcarnitine                              | 0.08      | -0.12              | 0.27                | 0.437      | 0.946                      |
| cAMP                                          | -<br>0.03 | -0.16              | 0.10                | 0.672      | 0.946                      |
| Carnitine                                     | 0.16      | -0.10              | 0.42                | 0.229      | 0.946                      |
| Choline                                       | -<br>0.29 | -0.59              | 0.00                | 0.054      | 0.774                      |
| Colchicine                                    | -<br>0.02 | -0.23              | 0.18                | 0.827      | 0.946                      |
| Creatine                                      | -<br>0.06 | -0.31              | 0.19                | 0.621      | 0.946                      |
| Cysteamine                                    | 0.05      | -0.19              | 0.30                | 0.665      | 0.946                      |
| Cysteine                                      | 0.03      | -0.27              | 0.33                | 0.847      | 0.946                      |
| Cytosine                                      | 0.08      | -0.15              | 0.32                | 0.481      | 0.946                      |
| DMGV                                          | 0.15      | -0.02              | 0.32                | 0.089      | 0.842                      |
| GlucosePos2                                   | 0.11      | -0.19              | 0.41                | 0.483      | 0.946                      |
| Glutamate                                     | 0.12      | -0.12              | 0.36                | 0.326      | 0.946                      |
| Glutamine                                     | 0.01      | -0.25              | 0.28                | 0.927      | 0.946                      |
| Histidine                                     | -<br>0.13 | -0.48              | 0.22                | 0.470      | 0.946                      |



|                               |           |       |      |       |       |
|-------------------------------|-----------|-------|------|-------|-------|
| <b>Isoleucine_Leucine</b>     | 0.06      | -0.16 | 0.28 | 0.612 | 0.946 |
| <b>Kynurenic acid</b>         | 0.08      | -0.06 | 0.22 | 0.263 | 0.946 |
| <b>L-Homoserine</b>           | -<br>0.04 | -0.24 | 0.16 | 0.668 | 0.946 |
| <b>Methionine</b>             | 0.20      | -0.04 | 0.43 | 0.095 | 0.842 |
| <b>Phenylalanine</b>          | 0.29      | -0.01 | 0.58 | 0.058 | 0.774 |
| <b>Phosphocholine</b>         | -<br>0.07 | -0.31 | 0.18 | 0.584 | 0.946 |
| <b>Proline</b>                | 0.04      | -0.20 | 0.28 | 0.753 | 0.946 |
| <b>Riboflavin</b>             | 0.17      | 0.06  | 0.28 | 0.003 | 0.176 |
| <b>Serine</b>                 | -<br>0.01 | -0.17 | 0.15 | 0.890 | 0.946 |
| <b>Serotonin</b>              | -<br>0.04 | -0.33 | 0.26 | 0.798 | 0.946 |
| <b>Spermine</b>               | 0.07      | -0.13 | 0.28 | 0.496 | 0.946 |
| <b>Taurine</b>                | 0.03      | -0.16 | 0.22 | 0.758 | 0.946 |
| <b>Thiamine</b>               | 0.23      | 0.02  | 0.44 | 0.028 | 0.755 |
| <b>Threonine</b>              | 0.04      | -0.26 | 0.34 | 0.804 | 0.946 |
| <b>Thymidine</b>              | -<br>0.26 | -0.61 | 0.08 | 0.134 | 0.946 |
| <b>TMAO</b>                   | -<br>0.05 | -0.29 | 0.19 | 0.707 | 0.946 |
| <b>trans-HYP</b>              | 0.00      | -0.15 | 0.15 | 0.984 | 0.984 |
| <b>Tyrosine</b>               | 0.08      | -0.17 | 0.32 | 0.539 | 0.946 |
| <b>Uridine</b>                | 0.02      | -0.21 | 0.25 | 0.858 | 0.946 |
| <b>Valine</b>                 | 0.03      | -0.22 | 0.28 | 0.792 | 0.946 |
| <b>Valine-d8</b>              | 0.05      | -0.13 | 0.23 | 0.559 | 0.946 |
| <b>1-methylhistamine</b>      | 0.03      | -0.27 | 0.33 | 0.840 | 0.946 |
| <b>2'-deoxyadenosine</b>      | 0.01      | -0.15 | 0.16 | 0.928 | 0.946 |
| <b>2-Arachidonyl glycerol</b> | -<br>0.07 | -0.36 | 0.22 | 0.651 | 0.946 |
| <b>3-deazadenosine</b>        | 0.21      | -0.09 | 0.51 | 0.174 | 0.946 |
| <b>3-IPA</b>                  | -<br>0.04 | -0.14 | 0.06 | 0.406 | 0.946 |
| <b>3HK</b>                    | 0.04      | -0.10 | 0.17 | 0.567 | 0.946 |
| <b>5-Aminolevulinic Acid</b>  | -<br>0.01 | -0.14 | 0.11 | 0.819 | 0.946 |

**Supplementary Table 11.** Multivariable Binary Logistic Regression Associations with Presence of CAD.

| Metabolite                                    | Odds Ratio | lower_CI | upper_CI | P value | FDR Adjusted P-value |
|-----------------------------------------------|------------|----------|----------|---------|----------------------|
| $\alpha$ -keto- $\beta$ -methylvaleric acid 1 | 0.80       | 0.47     | 1.36     | 0.415   | 0.936                |
| $\alpha$ -keto- $\beta$ -methylvaleric acid 2 | 1.17       | 0.80     | 1.71     | 0.408   | 0.936                |
| Acetylcarnitine                               | 0.91       | 0.71     | 1.16     | 0.434   | 0.936                |
| Adenosine                                     | 1.19       | 0.77     | 1.82     | 0.437   | 0.936                |
| Alanine                                       | 0.90       | 0.68     | 1.19     | 0.472   | 0.936                |
| Anandamide                                    | 0.91       | 0.59     | 1.40     | 0.678   | 0.936                |
| Arachidonic acid                              | 1.17       | 0.72     | 1.91     | 0.531   | 0.936                |
| Arginine                                      | 0.98       | 0.70     | 1.39     | 0.919   | 0.936                |
| Asparagine                                    | 1.10       | 0.71     | 1.70     | 0.661   | 0.936                |
| Aspartate                                     | 0.93       | 0.65     | 1.34     | 0.697   | 0.936                |
| Betaine                                       | 0.95       | 0.75     | 1.20     | 0.685   | 0.936                |
| Butyrylcarnitine                              | 0.87       | 0.64     | 1.19     | 0.380   | 0.936                |
| cAMP                                          | 1.03       | 0.81     | 1.30     | 0.814   | 0.936                |
| Carnitine                                     | 1.02       | 0.64     | 1.62     | 0.936   | 0.936                |
| Choline                                       | 1.47       | 0.92     | 2.35     | 0.104   | 0.936                |
| Colchicine                                    | 0.81       | 0.57     | 1.15     | 0.237   | 0.936                |
| Creatine                                      | 1.05       | 0.68     | 1.62     | 0.839   | 0.936                |
| Cysteamine                                    | 0.98       | 0.64     | 1.52     | 0.934   | 0.936                |
| Cysteine                                      | 1.12       | 0.69     | 1.80     | 0.653   | 0.936                |
| Cytosine                                      | 1.16       | 0.79     | 1.69     | 0.454   | 0.936                |
| DMGV                                          | 0.93       | 0.69     | 1.26     | 0.641   | 0.936                |
| GlucosePos2                                   | 0.88       | 0.55     | 1.39     | 0.580   | 0.936                |
| Glutamate                                     | 0.96       | 0.65     | 1.41     | 0.819   | 0.936                |
| Glutamine                                     | 0.74       | 0.45     | 1.23     | 0.249   | 0.936                |
| Histidine                                     | 0.96       | 0.54     | 1.68     | 0.877   | 0.936                |
| Isoleucine_Leucine                            | 1.02       | 0.68     | 1.51     | 0.935   | 0.936                |
| Kynurenic acid                                | 1.07       | 0.83     | 1.36     | 0.616   | 0.936                |
| L-Homoserine                                  | 1.08       | 0.78     | 1.51     | 0.637   | 0.936                |
| Methionine                                    | 0.93       | 0.63     | 1.37     | 0.715   | 0.936                |
| Phenylalanine                                 | 0.85       | 0.51     | 1.44     | 0.556   | 0.936                |
| Phosphocholine                                | 1.42       | 0.92     | 2.20     | 0.116   | 0.936                |
| Proline                                       | 1.02       | 0.69     | 1.52     | 0.909   | 0.936                |
| Riboflavin                                    | 1.05       | 0.86     | 1.29     | 0.609   | 0.936                |
| Serine                                        | 0.96       | 0.75     | 1.24     | 0.762   | 0.936                |
| Serotonin                                     | 0.93       | 0.56     | 1.54     | 0.768   | 0.936                |

|                               |      |      |      |       |       |
|-------------------------------|------|------|------|-------|-------|
| <b>Spermine</b>               | 1.21 | 0.84 | 1.73 | 0.309 | 0.936 |
| <b>Taurine</b>                | 0.99 | 0.72 | 1.36 | 0.934 | 0.936 |
| <b>Thiamine</b>               | 1.12 | 0.76 | 1.63 | 0.574 | 0.936 |
| <b>Threonine</b>              | 0.72 | 0.46 | 1.14 | 0.164 | 0.936 |
| <b>Thymidine</b>              | 1.05 | 0.57 | 1.92 | 0.877 | 0.936 |
| <b>TMAO</b>                   | 0.83 | 0.57 | 1.22 | 0.350 | 0.936 |
| <b>trans-HYP</b>              | 0.85 | 0.67 | 1.07 | 0.164 | 0.936 |
| <b>Tyrosine</b>               | 0.84 | 0.56 | 1.27 | 0.414 | 0.936 |
| <b>Uridine</b>                | 0.69 | 0.47 | 1.01 | 0.057 | 0.936 |
| <b>Valine</b>                 | 1.36 | 0.89 | 2.10 | 0.157 | 0.936 |
| <b>Valine-d8</b>              | 1.05 | 0.77 | 1.42 | 0.769 | 0.936 |
| <b>1-methylhistamine</b>      | 1.25 | 0.76 | 2.06 | 0.375 | 0.936 |
| <b>2'-deoxyadenosine</b>      | 0.97 | 0.75 | 1.25 | 0.816 | 0.936 |
| <b>2-Arachidonyl glycerol</b> | 0.87 | 0.56 | 1.37 | 0.554 | 0.936 |
| <b>3-deaazadenosine</b>       | 0.71 | 0.44 | 1.16 | 0.176 | 0.936 |
| <b>3-IPA</b>                  | 0.86 | 0.74 | 1.00 | 0.053 | 0.936 |
| <b>3HK</b>                    | 1.15 | 0.92 | 1.42 | 0.217 | 0.936 |
| <b>5-Aminolevulinic Acid</b>  | 0.99 | 0.80 | 1.22 | 0.891 | 0.936 |

**Supplementary Table 12.** Multivariable Binary Logistic Regression Associations with Presence of Calcified CAD.

| Metabolite                                    | Odds Ratio | lower_CI | upper_CI | P value | FDR Adjusted P-value |
|-----------------------------------------------|------------|----------|----------|---------|----------------------|
| $\alpha$ -keto- $\beta$ -methylvaleric acid 1 | 0.94       | 0.56     | 1.58     | 0.805   | 0.983                |
| $\alpha$ -keto- $\beta$ -methylvaleric acid 2 | 1.11       | 0.77     | 1.61     | 0.574   | 0.983                |
| Acetylcarnitine                               | 0.96       | 0.75     | 1.23     | 0.744   | 0.983                |
| Adenosine                                     | 1.17       | 0.77     | 1.78     | 0.461   | 0.983                |
| Alanine                                       | 0.92       | 0.70     | 1.20     | 0.531   | 0.983                |
| Anandamide                                    | 0.87       | 0.57     | 1.33     | 0.511   | 0.983                |
| Arachidonic acid                              | 1.15       | 0.71     | 1.86     | 0.575   | 0.983                |
| Arginine                                      | 1.17       | 0.83     | 1.65     | 0.364   | 0.983                |
| Asparagine                                    | 1.13       | 0.73     | 1.72     | 0.587   | 0.983                |
| Aspartate                                     | 0.98       | 0.68     | 1.40     | 0.897   | 0.983                |
| Betaine                                       | 0.96       | 0.77     | 1.21     | 0.747   | 0.983                |
| Butyrylcarnitine                              | 0.98       | 0.72     | 1.33     | 0.906   | 0.983                |
| cAMP                                          | 1.00       | 0.80     | 1.26     | 0.973   | 0.983                |
| Carnitine                                     | 1.05       | 0.67     | 1.64     | 0.834   | 0.983                |
| Choline                                       | 1.31       | 0.82     | 2.08     | 0.253   | 0.983                |
| Colchicine                                    | 0.83       | 0.59     | 1.17     | 0.289   | 0.983                |
| Creatine                                      | 1.01       | 0.66     | 1.54     | 0.983   | 0.983                |
| Cysteamine                                    | 0.88       | 0.57     | 1.37     | 0.576   | 0.983                |
| Cysteine                                      | 1.44       | 0.89     | 2.33     | 0.138   | 0.983                |
| Cytosine                                      | 1.30       | 0.89     | 1.89     | 0.178   | 0.983                |
| DMGV                                          | 1.11       | 0.83     | 1.50     | 0.482   | 0.983                |
| GlucosePos2                                   | 0.71       | 0.45     | 1.13     | 0.149   | 0.983                |
| Glutamate                                     | 1.07       | 0.73     | 1.57     | 0.736   | 0.983                |
| Glutamine                                     | 0.68       | 0.41     | 1.11     | 0.125   | 0.983                |
| Histidine                                     | 1.26       | 0.72     | 2.19     | 0.414   | 0.983                |
| Isoleucine_Leucine                            | 0.96       | 0.65     | 1.41     | 0.830   | 0.983                |
| Kynurenic acid                                | 1.22       | 0.96     | 1.55     | 0.102   | 0.983                |
| L-Homoserine                                  | 1.21       | 0.87     | 1.67     | 0.261   | 0.983                |
| Methionine                                    | 1.04       | 0.71     | 1.51     | 0.844   | 0.983                |
| Phenylalanine                                 | 0.97       | 0.59     | 1.62     | 0.921   | 0.983                |
| Phosphocholine                                | 1.17       | 0.77     | 1.78     | 0.460   | 0.983                |
| Proline                                       | 1.06       | 0.72     | 1.56     | 0.756   | 0.983                |
| Riboflavin                                    | 1.06       | 0.87     | 1.28     | 0.586   | 0.983                |
| Serine                                        | 1.07       | 0.83     | 1.37     | 0.620   | 0.983                |
| Serotonin                                     | 0.81       | 0.49     | 1.33     | 0.400   | 0.983                |
| Spermine                                      | 1.37       | 0.96     | 1.95     | 0.086   | 0.983                |
| Taurine                                       | 0.99       | 0.73     | 1.36     | 0.966   | 0.983                |

|                               |      |      |      |       |       |
|-------------------------------|------|------|------|-------|-------|
| <b>Thiamine</b>               | 1.10 | 0.76 | 1.59 | 0.607 | 0.983 |
| <b>Threonine</b>              | 0.92 | 0.59 | 1.44 | 0.714 | 0.983 |
| <b>Thymidine</b>              | 0.90 | 0.50 | 1.63 | 0.734 | 0.983 |
| <b>TMAO</b>                   | 1.03 | 0.71 | 1.50 | 0.880 | 0.983 |
| <b>trans-HYP</b>              | 0.89 | 0.71 | 1.12 | 0.316 | 0.983 |
| <b>Tyrosine</b>               | 1.02 | 0.69 | 1.51 | 0.914 | 0.983 |
| <b>Uridine</b>                | 0.68 | 0.47 | 0.98 | 0.041 | 0.983 |
| <b>Valine</b>                 | 1.28 | 0.84 | 1.94 | 0.257 | 0.983 |
| <b>Valine-d8</b>              | 1.01 | 0.75 | 1.36 | 0.948 | 0.983 |
| <b>1-methylhistamine</b>      | 1.05 | 0.64 | 1.71 | 0.850 | 0.983 |
| <b>2'-deoxyadenosine</b>      | 1.02 | 0.79 | 1.31 | 0.900 | 0.983 |
| <b>2-Arachidonyl glycerol</b> | 0.82 | 0.52 | 1.27 | 0.372 | 0.983 |
| <b>3-deaazadenosine</b>       | 0.78 | 0.48 | 1.27 | 0.323 | 0.983 |
| <b>3-IPA</b>                  | 0.88 | 0.76 | 1.03 | 0.107 | 0.983 |
| <b>3HK</b>                    | 1.12 | 0.91 | 1.38 | 0.300 | 0.983 |
| <b>5-Aminolevulinic Acid</b>  | 0.98 | 0.80 | 1.21 | 0.883 | 0.983 |

**Supplementary Table 13.** Multivariable Binary Logistic Regression Associations with Presence of Non-Calcified CAD.

| Metabolite                                    | Odds Ratio | lower_CI | upper_CI | P value | FDR Adjusted P-value |
|-----------------------------------------------|------------|----------|----------|---------|----------------------|
| $\alpha$ -keto- $\beta$ -methylvaleric acid 1 | 1.08       | 0.67     | 1.73     | 0.756   | 0.912                |
| $\alpha$ -keto- $\beta$ -methylvaleric acid 2 | 0.92       | 0.66     | 1.28     | 0.606   | 0.912                |
| Acetylcarnitine                               | 0.98       | 0.79     | 1.23     | 0.881   | 0.960                |
| Adenosine                                     | 0.94       | 0.65     | 1.37     | 0.757   | 0.912                |
| Alanine                                       | 0.96       | 0.75     | 1.23     | 0.751   | 0.912                |
| Anandamide                                    | 0.88       | 0.60     | 1.29     | 0.506   | 0.912                |
| Arachidonic acid                              | 0.96       | 0.62     | 1.50     | 0.856   | 0.960                |
| Arginine                                      | 0.87       | 0.63     | 1.18     | 0.368   | 0.880                |
| Asparagine                                    | 0.98       | 0.67     | 1.44     | 0.929   | 0.965                |
| Aspartate                                     | 0.76       | 0.55     | 1.06     | 0.106   | 0.880                |
| Betaine                                       | 1.01       | 0.82     | 1.24     | 0.937   | 0.965                |
| Butyrylcarnitine                              | 0.92       | 0.69     | 1.22     | 0.552   | 0.912                |
| cAMP                                          | 1.03       | 0.84     | 1.26     | 0.809   | 0.953                |
| Carnitine                                     | 1.20       | 0.80     | 1.79     | 0.387   | 0.880                |
| Choline                                       | 1.61       | 1.05     | 2.49     | 0.031   | 0.545                |
| Colchicine                                    | 0.86       | 0.63     | 1.17     | 0.329   | 0.880                |
| Creatine                                      | 1.01       | 0.69     | 1.49     | 0.947   | 0.965                |
| Cysteamine                                    | 0.90       | 0.60     | 1.33     | 0.588   | 0.912                |
| Cysteine                                      | 0.77       | 0.50     | 1.19     | 0.239   | 0.880                |
| Cytosine                                      | 0.86       | 0.61     | 1.21     | 0.399   | 0.880                |
| DMGV                                          | 1.05       | 0.80     | 1.38     | 0.717   | 0.912                |
| GlucosePos2                                   | 1.09       | 0.71     | 1.65     | 0.703   | 0.912                |
| Glutamate                                     | 1.42       | 1.00     | 2.03     | 0.053   | 0.699                |
| Glutamine                                     | 0.86       | 0.56     | 1.32     | 0.488   | 0.912                |
| Histidine                                     | 0.70       | 0.42     | 1.16     | 0.168   | 0.880                |
| Isoleucine_Leucine                            | 1.17       | 0.82     | 1.65     | 0.386   | 0.880                |
| Kynurenic acid                                | 1.04       | 0.83     | 1.29     | 0.747   | 0.912                |
| L-Homoserine                                  | 0.99       | 0.74     | 1.33     | 0.971   | 0.971                |
| Methionine                                    | 1.18       | 0.83     | 1.67     | 0.351   | 0.880                |
| Phenylalanine                                 | 0.73       | 0.46     | 1.15     | 0.176   | 0.880                |
| Phosphocholine                                | 1.32       | 0.90     | 1.94     | 0.154   | 0.880                |
| Proline                                       | 0.93       | 0.65     | 1.34     | 0.700   | 0.912                |
| Riboflavin                                    | 1.08       | 0.91     | 1.29     | 0.374   | 0.880                |
| Serine                                        | 1.12       | 0.89     | 1.41     | 0.339   | 0.880                |
| Serotonin                                     | 0.77       | 0.49     | 1.21     | 0.253   | 0.880                |
| Spermine                                      | 1.13       | 0.82     | 1.56     | 0.445   | 0.912                |
| Taurine                                       | 0.94       | 0.70     | 1.25     | 0.650   | 0.912                |

|                               |      |      |      |       |       |
|-------------------------------|------|------|------|-------|-------|
| <b>Thiamine</b>               | 1.13 | 0.82 | 1.56 | 0.457 | 0.912 |
| <b>Threonine</b>              | 1.10 | 0.73 | 1.66 | 0.646 | 0.912 |
| <b>Thymidine</b>              | 0.87 | 0.51 | 1.50 | 0.617 | 0.912 |
| <b>TMAO</b>                   | 0.65 | 0.46 | 0.92 | 0.016 | 0.420 |
| <b>trans-HYP</b>              | 0.98 | 0.80 | 1.21 | 0.871 | 0.960 |
| <b>Tyrosine</b>               | 1.14 | 0.80 | 1.63 | 0.481 | 0.912 |
| <b>Uridine</b>                | 0.81 | 0.58 | 1.13 | 0.217 | 0.880 |
| <b>Valine</b>                 | 1.13 | 0.77 | 1.66 | 0.525 | 0.912 |
| <b>Valine-d8</b>              | 1.14 | 0.87 | 1.50 | 0.347 | 0.880 |
| <b>1-methylhistamine</b>      | 0.97 | 0.62 | 1.51 | 0.887 | 0.960 |
| <b>2'-deoxyadenosine</b>      | 1.13 | 0.90 | 1.42 | 0.304 | 0.880 |
| <b>2-Arachidonyl glycerol</b> | 1.25 | 0.83 | 1.88 | 0.281 | 0.880 |
| <b>3-deaazadenosine</b>       | 1.10 | 0.71 | 1.70 | 0.684 | 0.912 |
| <b>3-IPA</b>                  | 0.83 | 0.72 | 0.96 | 0.011 | 0.420 |
| <b>3HK</b>                    | 1.20 | 0.99 | 1.45 | 0.067 | 0.706 |
| <b>5-Aminolevulinic Acid</b>  | 1.14 | 0.94 | 1.37 | 0.177 | 0.880 |

**Supplementary Table 14.** Multivariable Binary Logistic Regression Associations with Presence of Obstructive CAD.

| Metabolite                                    | Odds Ratio | lower_CI | upper_CI | P value | FDR Adjusted P-value |
|-----------------------------------------------|------------|----------|----------|---------|----------------------|
| $\alpha$ -keto- $\beta$ -methylvaleric acid 1 | 0.98       | 0.35     | 2.73     | 0.969   | 0.997                |
| $\alpha$ -keto- $\beta$ -methylvaleric acid 2 | 1.15       | 0.6      | 2.19     | 0.674   | 0.913                |
| Acetylcarnitine                               | 0.90       | 0.59     | 1.38     | 0.63    | 0.913                |
| Adenosine                                     | 1.39       | 0.67     | 2.88     | 0.373   | 0.913                |
| Alanine                                       | 1.11       | 0.69     | 1.8      | 0.663   | 0.913                |
| Anandamide                                    | 0.62       | 0.30     | 1.29     | 0.203   | 0.913                |
| Arachidonic acid                              | 1.16       | 0.48     | 2.81     | 0.736   | 0.913                |
| Arginine                                      | 1.08       | 0.61     | 1.93     | 0.793   | 0.913                |
| Asparagine                                    | 1.66       | 0.81     | 3.42     | 0.17    | 0.913                |
| Aspartate                                     | 1          | 0.55     | 1.84     | 0.997   | 0.997                |
| Betaine                                       | 1.18       | 0.79     | 1.76     | 0.431   | 0.913                |
| Butyrylcarnitine                              | 1.42       | 0.77     | 2.62     | 0.264   | 0.913                |
| cAMP                                          | 1.05       | 0.74     | 1.49     | 0.783   | 0.913                |
| Carnitine                                     | 1          | 0.42     | 2.41     | 0.996   | 0.997                |
| Choline                                       | 1.2        | 0.51     | 2.82     | 0.67    | 0.913                |
| Colchicine                                    | 0.79       | 0.40     | 1.55     | 0.494   | 0.913                |
| Creatine                                      | 1.46       | 0.67     | 3.17     | 0.344   | 0.913                |
| Cysteamine                                    | 0.59       | 0.27     | 1.28     | 0.184   | 0.913                |
| Cysteine                                      | 1.27       | 0.55     | 2.95     | 0.574   | 0.913                |
| Cytosine                                      | 1.25       | 0.61     | 2.56     | 0.534   | 0.913                |
| DMGV                                          | 1.65       | 0.92     | 2.96     | 0.094   | 0.913                |
| GlucosePos2                                   | 0.81       | 0.37     | 1.75     | 0.583   | 0.913                |
| Glutamate                                     | 1.3        | 0.64     | 2.66     | 0.472   | 0.913                |
| Glutamine                                     | 0.89       | 0.37     | 2.12     | 0.787   | 0.913                |
| Histidine                                     | 0.67       | 0.25     | 1.75     | 0.408   | 0.913                |
| Isoleucine_Leucine                            | 1.2        | 0.55     | 2.62     | 0.651   | 0.913                |
| Kynurenic acid                                | 1.16       | 0.74     | 1.8      | 0.523   | 0.913                |
| L-Homoserine                                  | 0.95       | 0.55     | 1.66     | 0.867   | 0.96                 |
| Methionine                                    | 1.3        | 0.66     | 2.56     | 0.455   | 0.913                |
| Phenylalanine                                 | 1.22       | 0.51     | 2.91     | 0.661   | 0.913                |
| Phosphocholine                                | 1.91       | 0.91     | 4.02     | 0.087   | 0.913                |
| Proline                                       | 0.89       | 0.43     | 1.86     | 0.756   | 0.913                |
| Riboflavin                                    | 1.24       | 0.9      | 1.71     | 0.183   | 0.913                |
| Serine                                        | 0.96       | 0.61     | 1.52     | 0.87    | 0.96                 |
| Serotonin                                     | 0.82       | 0.38     | 1.75     | 0.599   | 0.913                |
| Spermine                                      | 1.3        | 0.71     | 2.39     | 0.39    | 0.913                |
| Taurine                                       | 0.9        | 0.51     | 1.57     | 0.702   | 0.913                |



|                               |      |      |      |        |       |
|-------------------------------|------|------|------|--------|-------|
| <b>Thiamine</b>               | 1.15 | 0.68 | 1.95 | 0.593  | 0.913 |
| <b>Threonine</b>              | 0.51 | 0.23 | 1.1  | 0.0857 | 0.913 |
| <b>Thymidine</b>              | 0.78 | 0.27 | 2.25 | 0.651  | 0.913 |
| <b>TMAO</b>                   | 0.84 | 0.45 | 1.59 | 0.6    | 0.913 |
| <b>trans-HYP</b>              | 0.92 | 0.63 | 1.36 | 0.684  | 0.913 |
| <b>Tyrosine</b>               | 1.13 | 0.54 | 2.36 | 0.743  | 0.913 |
| <b>Uridine</b>                | 0.78 | 0.43 | 1.42 | 0.417  | 0.913 |
| <b>Valine</b>                 | 1.87 | 0.9  | 3.91 | 0.0944 | 0.913 |
| <b>Valine-d8</b>              | 1.47 | 0.85 | 2.53 | 0.167  | 0.913 |
| <b>1-methylhistamine</b>      | 0.96 | 0.41 | 2.24 | 0.93   | 0.997 |
| <b>2'-deoxyadenosine</b>      | 0.99 | 0.64 | 1.52 | 0.962  | 0.997 |
| <b>2-Arachidonyl glycerol</b> | 0.79 | 0.38 | 1.63 | 0.516  | 0.913 |
| <b>3-deaazadenosine</b>       | 0.84 | 0.38 | 1.88 | 0.676  | 0.913 |
| <b>3-IPA</b>                  | 0.72 | 0.56 | 0.94 | 0.016  | 0.829 |
| <b>3HK</b>                    | 1.13 | 0.8  | 1.58 | 0.489  | 0.913 |
| <b>5-Aminolevulinic Acid</b>  | 0.89 | 0.63 | 1.25 | 0.487  | 0.913 |

**Supplementary Table 15.** Multivariable Linear Regression Associations with Gensini Score.

| Metabolite                                    | Beta  | lower_CI<br>.25 % | upper_CI<br>.97.5 % | P value | FDR<br>Adjusted<br>P-value |
|-----------------------------------------------|-------|-------------------|---------------------|---------|----------------------------|
| $\alpha$ -keto- $\beta$ -methylvaleric acid 1 | -0.03 | -0.29             | 0.23                | 0.811   | 0.896                      |
| $\alpha$ -keto- $\beta$ -methylvaleric acid 2 | -0.17 | -0.36             | 0.02                | 0.081   | 0.533                      |
| Acetylcarnitine                               | 0.02  | -0.11             | 0.15                | 0.810   | 0.896                      |
| Adenosine                                     | -0.03 | -0.24             | 0.17                | 0.747   | 0.896                      |
| Alanine                                       | -0.08 | -0.23             | 0.06                | 0.247   | 0.769                      |
| Anandamide                                    | -0.01 | -0.24             | 0.22                | 0.901   | 0.936                      |
| Arachidonic acid                              | 0.11  | -0.15             | 0.37                | 0.396   | 0.769                      |
| Arginine                                      | 0.00  | -0.19             | 0.18                | 0.960   | 0.979                      |
| Asparagine                                    | -0.16 | -0.38             | 0.06                | 0.160   | 0.741                      |
| Aspartate                                     | -0.08 | -0.27             | 0.12                | 0.435   | 0.769                      |
| Betaine                                       | 0.04  | -0.09             | 0.16                | 0.568   | 0.890                      |
| Butyrylcarnitine                              | 0.03  | -0.13             | 0.20                | 0.705   | 0.890                      |
| cAMP                                          | -0.03 | -0.14             | 0.08                | 0.584   | 0.890                      |
| Carnitine                                     | 0.26  | 0.03              | 0.49                | 0.030   | 0.402                      |
| Choline                                       | -0.03 | -0.28             | 0.23                | 0.832   | 0.900                      |
| Colchicine                                    | 0.04  | -0.15             | 0.22                | 0.691   | 0.890                      |
| Creatine                                      | 0.00  | -0.22             | 0.22                | 0.997   | 0.997                      |
| Cysteamine                                    | -0.12 | -0.34             | 0.09                | 0.247   | 0.769                      |
| Cysteine                                      | -0.06 | -0.31             | 0.19                | 0.636   | 0.890                      |
| Cytosine                                      | 0.09  | -0.10             | 0.29                | 0.346   | 0.769                      |
| DMGV                                          | 0.17  | 0.02              | 0.32                | 0.026   | 0.402                      |
| GlucosePos2                                   | 0.11  | -0.15             | 0.38                | 0.396   | 0.769                      |
| Glutamate                                     | 0.10  | -0.10             | 0.30                | 0.333   | 0.769                      |
| Glutamine                                     | 0.03  | -0.20             | 0.26                | 0.801   | 0.896                      |
| Histidine                                     | -0.08 | -0.38             | 0.21                | 0.572   | 0.890                      |
| Isoleucine_Leucine                            | -0.04 | -0.24             | 0.16                | 0.679   | 0.890                      |
| Kynurenic acid                                | 0.11  | -0.01             | 0.23                | 0.079   | 0.533                      |
| L-Homoserine                                  | 0.03  | -0.15             | 0.20                | 0.772   | 0.896                      |
| Methionine                                    | 0.22  | 0.02              | 0.43                | 0.030   | 0.402                      |
| Phenylalanine                                 | 0.26  | 0.01              | 0.52                | 0.046   | 0.402                      |
| Phosphocholine                                | 0.02  | -0.20             | 0.23                | 0.874   | 0.926                      |
| Proline                                       | -0.05 | -0.26             | 0.17                | 0.674   | 0.890                      |
| Riboflavin                                    | 0.12  | 0.03              | 0.22                | 0.014   | 0.402                      |
| Serine                                        | 0.06  | -0.07             | 0.20                | 0.354   | 0.769                      |
| Serotonin                                     | -0.11 | -0.37             | 0.15                | 0.398   | 0.769                      |
| Spermine                                      | -0.04 | -0.22             | 0.14                | 0.681   | 0.890                      |
| Taurine                                       | 0.05  | -0.11             | 0.22                | 0.536   | 0.890                      |

|                               |       |       |       |       |       |
|-------------------------------|-------|-------|-------|-------|-------|
| <b>Thiamine</b>               | 0.11  | -0.07 | 0.29  | 0.242 | 0.769 |
| <b>Threonine</b>              | 0.12  | -0.14 | 0.37  | 0.371 | 0.769 |
| <b>Thymidine</b>              | -0.17 | -0.47 | 0.14  | 0.289 | 0.769 |
| <b>TMAO</b>                   | -0.21 | -0.42 | -0.01 | 0.044 | 0.402 |
| <b>trans-HYP</b>              | 0.03  | -0.10 | 0.15  | 0.671 | 0.890 |
| <b>Tyrosine</b>               | 0.15  | -0.06 | 0.36  | 0.152 | 0.741 |
| <b>Uridine</b>                | -0.03 | -0.24 | 0.17  | 0.752 | 0.896 |
| <b>Valine</b>                 | -0.05 | -0.27 | 0.17  | 0.661 | 0.890 |
| <b>Valine-d8</b>              | 0.06  | -0.09 | 0.22  | 0.426 | 0.769 |
| <b>1-methylhistamine</b>      | -0.17 | -0.42 | 0.08  | 0.187 | 0.762 |
| <b>2'-deoxyadenosine</b>      | 0.09  | -0.05 | 0.22  | 0.202 | 0.766 |
| <b>2-Arachidonyl glycerol</b> | 0.12  | -0.13 | 0.37  | 0.358 | 0.769 |
| <b>3-deaazadenosine</b>       | 0.18  | -0.08 | 0.43  | 0.168 | 0.741 |
| <b>3-IPA</b>                  | -0.07 | -0.16 | 0.01  | 0.091 | 0.537 |
| <b>3HK</b>                    | 0.05  | -0.07 | 0.16  | 0.412 | 0.769 |
| <b>5-Aminolevulinic Acid</b>  | 0.05  | -0.06 | 0.15  | 0.388 | 0.769 |

**Supplementary Table 16.** Multivariable Linear Regression Associations with CACS.

| Metabolite                                    | Beta  | lower_CI<br>.25 % | upper_CI<br>.97.5 % | P value | FDR<br>Adjusted<br>P-value |
|-----------------------------------------------|-------|-------------------|---------------------|---------|----------------------------|
| $\alpha$ -keto- $\beta$ -methylvaleric acid 1 | -0.20 | -0.80             | 0.40                | 0.519   | 0.844                      |
| $\alpha$ -keto- $\beta$ -methylvaleric acid 2 | -0.38 | -0.82             | 0.05                | 0.084   | 0.422                      |
| Acetylcarnitine                               | 0.09  | -0.21             | 0.40                | 0.548   | 0.844                      |
| Adenosine                                     | -0.28 | -0.75             | 0.19                | 0.247   | 0.595                      |
| Alanine                                       | -0.21 | -0.53             | 0.12                | 0.209   | 0.578                      |
| Anandamide                                    | 0.21  | -0.32             | 0.74                | 0.434   | 0.844                      |
| Arachidonic acid                              | 0.42  | -0.16             | 1.00                | 0.156   | 0.516                      |
| Arginine                                      | 0.02  | -0.41             | 0.45                | 0.922   | 0.955                      |
| Asparagine                                    | -0.46 | -0.97             | 0.05                | 0.076   | 0.422                      |
| Aspartate                                     | -0.16 | -0.62             | 0.30                | 0.494   | 0.844                      |
| Betaine                                       | 0.19  | -0.09             | 0.48                | 0.187   | 0.550                      |
| Butyrylcarnitine                              | 0.31  | -0.08             | 0.70                | 0.122   | 0.453                      |
| cAMP                                          | -0.01 | -0.26             | 0.25                | 0.968   | 0.968                      |
| Carnitine                                     | 0.64  | 0.10              | 1.17                | 0.020   | 0.263                      |
| Choline                                       | -0.06 | -0.65             | 0.53                | 0.829   | 0.940                      |
| Colchicine                                    | -0.05 | -0.46             | 0.37                | 0.829   | 0.940                      |
| Creatine                                      | 0.23  | -0.27             | 0.73                | 0.361   | 0.765                      |
| Cysteamine                                    | -0.44 | -0.95             | 0.06                | 0.088   | 0.422                      |
| Cysteine                                      | -0.35 | -0.92             | 0.22                | 0.230   | 0.581                      |
| Cytosine                                      | 0.02  | -0.42             | 0.47                | 0.924   | 0.955                      |
| DMGV                                          | 0.32  | -0.03             | 0.67                | 0.074   | 0.422                      |
| GlucosePos2                                   | 0.14  | -0.47             | 0.76                | 0.645   | 0.918                      |
| Glutamate                                     | 0.05  | -0.43             | 0.53                | 0.833   | 0.940                      |
| Glutamine                                     | 0.11  | -0.41             | 0.64                | 0.670   | 0.918                      |
| Histidine                                     | -0.25 | -0.93             | 0.42                | 0.458   | 0.844                      |
| Isoleucine_Leucine                            | -0.02 | -0.47             | 0.42                | 0.921   | 0.955                      |
| Kynurenic acid                                | 0.25  | -0.03             | 0.53                | 0.081   | 0.422                      |
| L-Homoserine                                  | -0.08 | -0.47             | 0.31                | 0.688   | 0.918                      |
| Methionine                                    | 0.46  | -0.01             | 0.93                | 0.053   | 0.422                      |
| Phenylalanine                                 | 0.77  | 0.19              | 1.35                | 0.010   | 0.263                      |
| Phosphocholine                                | -0.02 | -0.53             | 0.48                | 0.929   | 0.955                      |
| Proline                                       | 0.09  | -0.40             | 0.59                | 0.710   | 0.918                      |
| Riboflavin                                    | 0.27  | 0.05              | 0.50                | 0.018   | 0.263                      |
| Serine                                        | -0.05 | -0.37             | 0.26                | 0.744   | 0.939                      |
| Serotonin                                     | -0.09 | -0.67             | 0.50                | 0.775   | 0.940                      |
| Spermine                                      | -0.28 | -0.70             | 0.14                | 0.184   | 0.550                      |
| Taurine                                       | 0.29  | -0.08             | 0.67                | 0.128   | 0.453                      |

|                               |       |       |       |       |       |
|-------------------------------|-------|-------|-------|-------|-------|
| <b>Thiamine</b>               | 0.37  | -0.04 | 0.78  | 0.077 | 0.422 |
| <b>Threonine</b>              | -0.02 | -0.62 | 0.57  | 0.937 | 0.955 |
| <b>Thymidine</b>              | 0.21  | -0.50 | 0.92  | 0.558 | 0.844 |
| <b>TMAO</b>                   | -0.58 | -1.05 | -0.10 | 0.017 | 0.263 |
| <b>trans-HYP</b>              | 0.09  | -0.19 | 0.38  | 0.531 | 0.844 |
| <b>Tyrosine</b>               | 0.40  | -0.08 | 0.88  | 0.101 | 0.423 |
| <b>Uridine</b>                | 0.23  | -0.23 | 0.69  | 0.324 | 0.716 |
| <b>Valine</b>                 | 0.07  | -0.45 | 0.58  | 0.802 | 0.940 |
| <b>Valine-d8</b>              | 0.20  | -0.15 | 0.55  | 0.267 | 0.615 |
| <b>1-methylhistamine</b>      | -0.19 | -0.79 | 0.42  | 0.543 | 0.844 |
| <b>2'-deoxyadenosine</b>      | 0.19  | -0.11 | 0.50  | 0.218 | 0.578 |
| <b>2-Arachidonyl glycerol</b> | 0.24  | -0.34 | 0.82  | 0.420 | 0.844 |
| <b>3-deaazadenosine</b>       | 0.48  | -0.10 | 1.06  | 0.104 | 0.423 |
| <b>3-IPA</b>                  | -0.04 | -0.24 | 0.16  | 0.697 | 0.918 |
| <b>3HK</b>                    | 0.08  | -0.18 | 0.34  | 0.549 | 0.844 |
| <b>5-Aminolevulinic Acid</b>  | 0.06  | -0.19 | 0.31  | 0.626 | 0.918 |

**Supplementary Table 17.** Multivariable Linear Regression Associations with SPS.

| Metabolite                                    | Beta  | lower_CI<br>.25 % | upper_CI<br>.97.5 % | P value | FDR<br>Adjusted<br>P-value |
|-----------------------------------------------|-------|-------------------|---------------------|---------|----------------------------|
| $\alpha$ -keto- $\beta$ -methylvaleric acid 1 | 0.00  | -0.28             | 0.28                | 0.993   | 0.993                      |
| $\alpha$ -keto- $\beta$ -methylvaleric acid 2 | 0.04  | -0.19             | 0.26                | 0.752   | 0.993                      |
| Acetylcarnitine                               | -0.04 | -0.19             | 0.11                | 0.578   | 0.993                      |
| Adenosine                                     | 0.06  | -0.17             | 0.29                | 0.608   | 0.993                      |
| Alanine                                       | -0.03 | -0.20             | 0.13                | 0.699   | 0.993                      |
| Anandamide                                    | -0.05 | -0.31             | 0.22                | 0.728   | 0.993                      |
| Arachidonic acid                              | 0.15  | -0.14             | 0.44                | 0.318   | 0.993                      |
| Arginine                                      | -0.04 | -0.25             | 0.18                | 0.743   | 0.993                      |
| Asparagine                                    | -0.18 | -0.43             | 0.06                | 0.147   | 0.993                      |
| Aspartate                                     | -0.09 | -0.31             | 0.13                | 0.429   | 0.993                      |
| Betaine                                       | 0.06  | -0.08             | 0.20                | 0.396   | 0.993                      |
| Butyrylcarnitine                              | 0.03  | -0.15             | 0.22                | 0.727   | 0.993                      |
| cAMP                                          | -0.08 | -0.20             | 0.05                | 0.244   | 0.993                      |
| Carnitine                                     | 0.16  | -0.09             | 0.42                | 0.211   | 0.993                      |
| Choline                                       | -0.29 | -0.58             | 0.01                | 0.054   | 0.993                      |
| Colchicine                                    | -0.02 | -0.22             | 0.18                | 0.843   | 0.993                      |
| Creatine                                      | -0.09 | -0.33             | 0.16                | 0.486   | 0.993                      |
| Cysteamine                                    | 0.09  | -0.15             | 0.33                | 0.456   | 0.993                      |
| Cysteine                                      | 0.02  | -0.28             | 0.31                | 0.917   | 0.993                      |
| Cytosine                                      | 0.05  | -0.18             | 0.28                | 0.682   | 0.993                      |
| DMGV                                          | 0.06  | -0.12             | 0.23                | 0.523   | 0.993                      |
| GlucosePos2                                   | 0.10  | -0.19             | 0.40                | 0.493   | 0.993                      |
| Glutamate                                     | 0.08  | -0.16             | 0.31                | 0.529   | 0.993                      |
| Glutamine                                     | 0.00  | -0.26             | 0.25                | 0.980   | 0.993                      |
| Histidine                                     | -0.09 | -0.43             | 0.25                | 0.597   | 0.993                      |
| Isoleucine_Leucine                            | 0.04  | -0.18             | 0.26                | 0.715   | 0.993                      |
| Kynurenic acid                                | 0.02  | -0.12             | 0.16                | 0.739   | 0.993                      |
| L-Homoserine                                  | -0.01 | -0.20             | 0.18                | 0.907   | 0.993                      |
| Methionine                                    | 0.14  | -0.08             | 0.37                | 0.215   | 0.993                      |
| Phenylalanine                                 | 0.24  | -0.05             | 0.53                | 0.106   | 0.993                      |
| Phosphocholine                                | -0.01 | -0.24             | 0.23                | 0.961   | 0.993                      |
| Proline                                       | -0.08 | -0.32             | 0.15                | 0.487   | 0.993                      |
| Riboflavin                                    | 0.15  | 0.04              | 0.26                | 0.007   | 0.367                      |
| Serine                                        | 0.00  | -0.16             | 0.15                | 0.981   | 0.993                      |
| Serotonin                                     | 0.03  | -0.25             | 0.32                | 0.813   | 0.993                      |
| Spermine                                      | -0.01 | -0.22             | 0.19                | 0.891   | 0.993                      |
| Taurine                                       | 0.02  | -0.17             | 0.21                | 0.825   | 0.993                      |

|                               |       |       |      |       |       |
|-------------------------------|-------|-------|------|-------|-------|
| <b>Thiamine</b>               | 0.17  | -0.04 | 0.37 | 0.108 | 0.993 |
| <b>Threonine</b>              | 0.01  | -0.28 | 0.30 | 0.936 | 0.993 |
| <b>Thymidine</b>              | -0.15 | -0.49 | 0.20 | 0.405 | 0.993 |
| <b>TMAO</b>                   | -0.09 | -0.32 | 0.15 | 0.475 | 0.993 |
| <b>trans-HYP</b>              | 0.00  | -0.14 | 0.15 | 0.971 | 0.993 |
| <b>Tyrosine</b>               | 0.10  | -0.13 | 0.34 | 0.398 | 0.993 |
| <b>Uridine</b>                | 0.09  | -0.14 | 0.32 | 0.433 | 0.993 |
| <b>Valine</b>                 | 0.03  | -0.22 | 0.28 | 0.797 | 0.993 |
| <b>Valine-d8</b>              | 0.05  | -0.12 | 0.23 | 0.543 | 0.993 |
| <b>1-methylhistamine</b>      | 0.01  | -0.28 | 0.30 | 0.962 | 0.993 |
| <b>2'-deoxyadenosine</b>      | 0.01  | -0.14 | 0.16 | 0.891 | 0.993 |
| <b>2-Arachidonyl glycerol</b> | -0.02 | -0.31 | 0.27 | 0.888 | 0.993 |
| <b>3-deaazadenosine</b>       | 0.12  | -0.18 | 0.42 | 0.426 | 0.993 |
| <b>3-IPA</b>                  | -0.04 | -0.14 | 0.06 | 0.429 | 0.993 |
| <b>3HK</b>                    | 0.01  | -0.12 | 0.14 | 0.885 | 0.993 |
| <b>5-Aminolevulinic Acid</b>  | -0.01 | -0.13 | 0.11 | 0.868 | 0.993 |

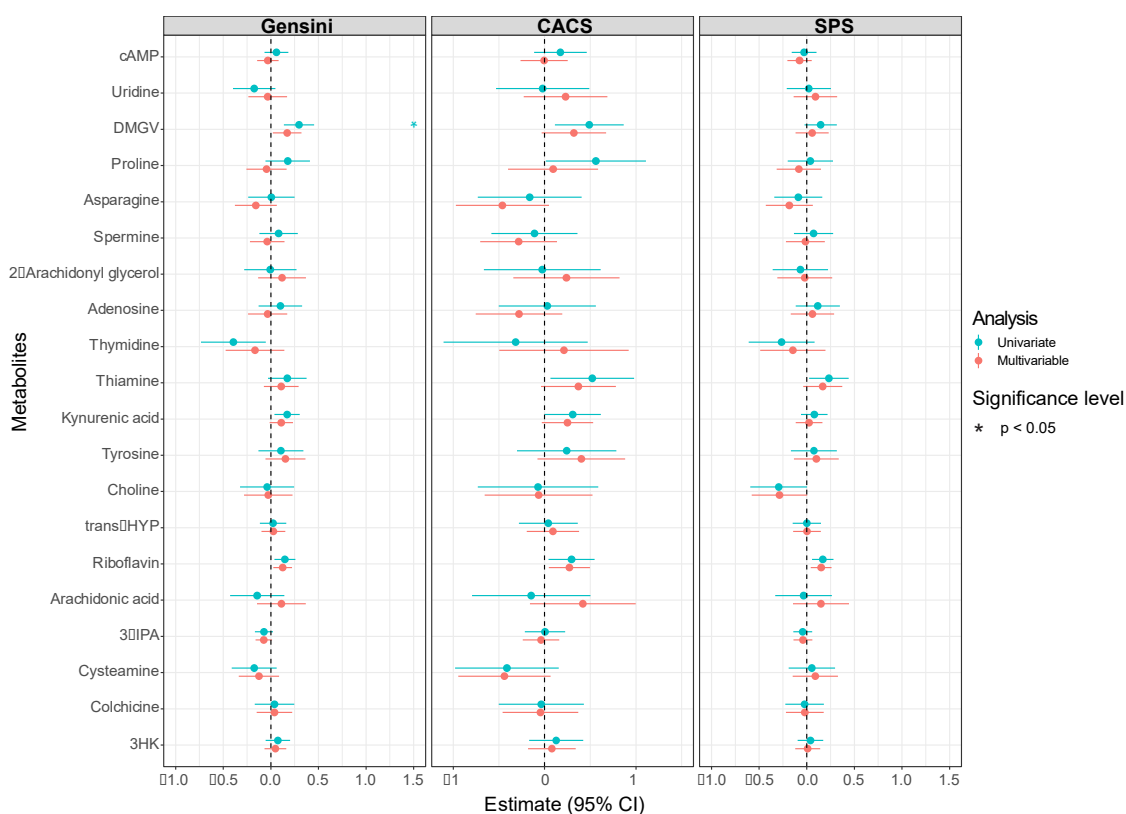

**Supplementary Figure 1:** Regression coefficients for association of top 20 metabolites for amount of CAD (left), calcified plaque (middle), and soft plaque (right). Ranked according to strength of univariate association with presence of CAD. Dots represent beta coefficients, lines represent 95% confidence intervals. P values are adjusted for a 5% discovery rate using Benjamini and Hochberg approach: \*  $p < 0.05$ . Turquoise represents univariate associations. Red represents associations adjusted for age, sex, hypertension, hypercholesterolaemia, diabetes, and significant smoking.
